1 **Estimates of autozygosity through runs of homozygosity in farmed coho salmon**

2 Grazyella M. Yoshida<sup>1</sup>, Pablo Cáceres<sup>1</sup>, Rodrigo Marín-Nahuelpi<sup>1</sup>, Ben F. Koop<sup>2</sup>, José M.  
3 Yáñez<sup>1,3\*</sup>

4 <sup>1</sup> Facultad de Ciencias Veterinarias y Pecuarias, Universidad de Chile, Santiago, Chile

5 <sup>2</sup>Department of Biology, Centre for Biomedical Research, University of Victoria, Victoria,  
6 BC, Canada

7 <sup>3</sup> Nucleo Milenio INVASAL, Concepción, Chile

8 \* Corresponding author: Facultad de Ciencias Veterinarias y Pecuarias, Universidad de  
9 Chile, 8820808, Santiago, Chile. E-mail: jmayanez@uchile.cl

10

11 **Abstract** - The characterization of runs of homozygosity (ROH), using high-density single  
12 nucleotide polymorphisms (SNPs) allows inferences to be made about the past demographic  
13 history of animal populations and the genomic ROH has become a common approach to  
14 characterize the inbreeding. We aimed to analyze and characterize ROH patterns and  
15 compare different genomic and pedigree-based methods to estimate the inbreeding  
16 coefficient in two pure lines (POP A and B) and one recently admixed line (POP C) of coho  
17 salmon breeding nuclei, genotyped using a 200K Affymetrix Axiom® myDesign Custom  
18 SNP Array. A large number and greater mean length of ROH were found for the two “pure”  
19 lines and the recently admixed line (POP C) showed the lowest number and smaller mean  
20 length of ROH. The ROH analysis for different length classes suggests that all three coho  
21 salmon lines the genome is largely composed of a high number of short segments (<4 Mb),  
22 and for POP C no segment >16 Mb was found. A high variable number of ROH, mean length  
23 and inbreeding values across chromosomes; positively the consequence of artificial selection.  
24 Pedigree-based inbreeding values tended to underestimate genomic-based inbreeding levels,

25 which in turn varied depending on the method used for estimation. The high positive  
26 correlations between different genomic-based inbreeding coefficients suggest that they are  
27 consistent and may be more accurate than pedigree-based methods, given that they capture  
28 information from past and more recent demographic events, even when there are no pedigree  
29 records available.

30 **Keywords:** admixture, autozygosity, inbreeding, run of homozygosity, *Oncorhynchus*  
31 *kisutch*, runs of homozygosity, pedigree

32

### 33 **1. Introduction**

34 Coho salmon (*Oncorhynchus kisutch*) is one of the six Pacific salmon species which  
35 can be found in North America and Asia [1]. In Chile, coho salmon farming began at the end  
36 of the 1970s, when about 500,000 eggs were imported from the Kitimat River (British  
37 Columbia) and Oregon to start the genetic basis of the Chilean broodstocks [2,3]. The first  
38 coho salmon breeding program started in 1992 with rapid growth as the main breeding  
39 objective. After four generations of selection for harvest weight, genetic gains of ~10% per  
40 generation were reported [2,3].

41 Genetic improvement programs for aquaculture species have been successfully  
42 established for increasing the productivity, for traits like growth and resistance against  
43 diseases [4,5]. However, one of the negative consequences of selective breeding is the  
44 accumulation of inbreeding, due to the use of related individuals for reproductive purposes  
45 [6]. As consequence, a reduction in both the additive genetic variance and diversity is  
46 observed, as well as a decrease in the response to selection. Furthermore, inbreeding can  
47 result in a phenomenon known as inbreeding depression, defined as a reduction in fitness  
48 traits, including growth, survival and reproductive ability, due to the expression of

49 detrimental recessive alleles given the existence of highly homozygous animals in the  
50 population [6,7]. Thus, monitoring and managing the inbreeding levels is critical in the  
51 operation of genetic improvement programs [8–10].

52 Inbreeding is traditionally calculated using pedigree records, the estimates might not  
53 reflect the true inbreeding level due to 1) the stochastic nature of recombination, 2) the  
54 assumption that there are no changes in allele frequencies in time and 3) the persistence of  
55 ancestral short segments through time [11]. In addition this approach fails to capture the  
56 relatedness among founder animals from the base population [12]. Furthermore, previous  
57 studies agreement that errors in pedigrees and incomplete or missing information lead to  
58 incorrect or biased inbreeding estimates [13]. The development of genomic technologies,  
59 including dense single nucleotide polymorphism (SNP) creates opportunities to estimate  
60 inbreeding from genomic-based approaches; for instance, identity by state (IBS) using a  
61 genomic relationship matrix [14] or through ROH [15].

62 ROH are defined as continuous homozygous segments of the individuals' genome  
63 [16], *i.e.*, genomic regions which have identical haplotypes that are identical by state (IBS),  
64 which might be a consequence of not random mating or consanguineous mating [17].  
65 Therefore, ROH can be used for quantifying individual autozygosity that occurs when parents  
66 have a common ancestor and pass on segments that are identical by decedent (IBD) to the  
67 progeny [18]. ROH may provide a more accurate measure of inbreeding levels, compared to  
68 using pedigree records [18,19]. Furthermore, the identification and characterization of ROH  
69 can provide insights into population history, structure and demographics over time [18,20].  
70 Long ROH segments are indicative of recent IBD, whereas short segments indicate ancient  
71 inbreeding, and the sum of all these segments are suggested to be an accurate estimation of  
72 the inbreeding level of an individual [21].

73 Inbreeding studies using genome-wide data were previously reported in humans  
74 [16,22,23], cattle [11,19,24–26], swine [27–29], sheep [30], and goats [31]. A recent study  
75 reported ROH patterns in rainbow trout populations to show the impact on selection on the  
76 genetic diversity in farmed stocks [32]. Studies aimed at ROH pattern characterization and  
77 comparisons between coefficients of inbreeding using different approaches are scarce in  
78 aquaculture species, due to the necessity of deep and complete pedigree information and  
79 dense genomic information. The objectives of this study were: (i) to identify and characterize  
80 the ROH patterns in three farmed Chilean coho salmon populations and (ii) to compare  
81 estimates of inbreeding coefficients calculated from runs of homozygosity ( $F_{ROH}$ ), genomic  
82 relationship matrix ( $F_{GRM}$ ), observed and expected number of homozygous genotypes  
83 ( $F_{HOM}$ ), and a pedigree-based relationship matrix ( $F_{PED}$ ).

84

## 85 **2. Methods**

### 86 *2.1 Coho salmon populations and genotypes*

87 Two independent coho salmon populations, managed in two-year reproductive cycles  
88 (POP A and POP B) were used in this study and belong to the Pesquera Antares breeding  
89 program established in Chile in 1997. Both populations have undergone nine generations of  
90 selection for harvest weight, since 1997 and 1998, POPA and B respectively. In addition,  
91 POP C is the progeny produced by mating sires from the seventh and dams from eighth  
92 generations of POP A and B, respectively. POP C was generated in 2013 to limit inbreeding  
93 levels, as suggested by Yáñez et al. [8]. The reproduction system, fish tagging and selection  
94 criteria of POP C were described previously [33,34].

95 Genomic DNA was extracted from fin clips of 88, 45 and 108 animals from POP A,  
96 B and C, respectively. The samples were genotyped using a 200K Affymetrix Axiom®

97 myDesign Custom SNP Array developed by the EPIC4 coho salmon genome consortium  
98 (<http://www.epic-4.org>) and built by ThermoFisher Scientific (San Diego, USA). More detail  
99 about the array design was previously described by Barria et al. [35]. A genotype quality  
100 control was performed in Plink v1.09 [36] using the following parameters to exclude  
101 markers: Hardy-Weinberg Equilibrium (HWE)  $p$ -value  $< 1e-6$ , Minor Allele Frequency  
102 (MAF)  $< 0.01$  and call rate  $< 0.90$  for genotypes and samples. Furthermore, we retained only  
103 the SNP markers that commonly segregated among the three populations.

104

## 105 *2.2 Principal components and admixture analysis*

106 We used the software Plink v1.09 [36] to evaluate the genetic differentiation among  
107 the three coho salmon populations through principal component analysis (PCA). The first  
108 two PCAs were plotted using R scripts [37]. The population structure was also examined  
109 using a hierarchical Bayesian model implemented in STRUCTURE software v.2.3.4 [38].  
110 We used three replicates of K values ranging from 1 to 12, running of 50,000 iterations and  
111 burn-in of 20,000 iterations. To choose the best K value we used the posterior probability  
112 values [38].

113

## 114 *2.3 Runs of homozygosity*

115 Runs of homozygosity analysis was performed separately for all animals in each  
116 population using the R package detectRUNS [39]. The following constraints were applied to  
117 ROH detected: (i) the minimum number of SNPs included in a ROH was 50, (ii) the minimum  
118 length of a ROH was set at 1 Mb, (iii) the maximum distance between adjacent SNPs was  
119 500 Kb, (iv) maximum missing genotypes allowed were 5, (v) density was at least 1 SNP per  
120 50 kb and (vi) sliding windows approach was used to detect ROH for each genotyped animal

121 at each marker position. ROH were classified into five length classes: 1–2, 2–4, 4–8, 8–16  
122 and > 16 Mb, identified as ROH<sub>1–2 Mb</sub>, ROH<sub>2–4 Mb</sub>, ROH<sub>4–8 Mb</sub>, ROH<sub>8–16 Mb</sub>, and ROH<sub>>16 Mb</sub>,  
123 respectively.

124

#### 125 *2.4 Inbreeding coefficient*

126 We estimated inbreeding coefficients using three different genomic methods and  
127 pedigree relationship matrix ( $F_{PED}$ ). Inbreeding coefficient based on runs of homozygosity  
128 ( $F_{ROH}$ ) was estimated for each animal based on all ROHs ( $ROH_{ALL}$ ) and the ROH distribution  
129 of five different lengths (ROH<sub>1–2 Mb</sub>, ROH<sub>2–4 Mb</sub>, ROH<sub>4–8 Mb</sub>, ROH<sub>8–16 Mb</sub>, and ROH<sub>>16 Mb</sub>), as  
130 follows [40]:

$$131 \quad F_{ROH} = \frac{L_{ROH}}{L_{AUTO}} \quad (eq. 1)$$

132 where  $L_{ROH}$  is the sum of ROH lengths and  $L_{AUTO}$  is the total length of genome covered by  
133 the genome-wide SNP panel used, assumed to be 1685.79 Mb.

134 The  $F_{HOM}$  was calculated by computing the number of observed and expected  
135 homozygous (hom) genotypes for each sample, as follows:

$$136 \quad F_{HOM} = \frac{\text{observed hom.} - \text{expected hom.}}{\text{total observations} - \text{expected hom.}} \quad (eq. 2)$$

137 The  $F_{GRM}$  was calculated using the genomic relationship matrix (GRM) [14], as  
138 follows:

$$139 \quad G = \frac{ZZ'}{2\sum_{i=1}^n p_i(1 - p_i)} \quad (eq. 3)$$

140 where  $Z$  is a genotype matrix that contains the 0 – 2p values for homozygotes, 1 – 2p for  
141 heterozygotes, and 2 – 2p for opposite homozygotes,  $p$  is the allele frequency of SNP  $i$ . The

142 diagonal elements of the matrix  $G$  represent the relationship of the animal  $j$  with itself, thus,  
143 the genomic inbreeding coefficient is calculated as  $G_{jj} - 1$ .

144 Pedigree-based inbreeding coefficients were estimated using the software  
145 INBUPGF90 [41]. The pedigree information used was provided by Pesquera Antares  
146 breeding program in Chile, for all animals born between 1998 and 2014, 1997 and 2013 and  
147 1998 and 2013 for POP A, B and C respectively.

148 Pearson correlation between genomic- and pedigree-based inbreeding coefficients  
149 was estimated within population using function *cor.test* in R [37].

150

### 151 **3. Results**

#### 152 *3.1 Quality control and genomic population structure*

153 The  $MAF < 0.01$  criteria excluded higher numbers of SNPs (~29.9, 19.7 and 18.5 K  
154 for POP A, B and C, respectively), and a number of markers between 3.2K to 14.9K were  
155 removed to select only common markers segregating across all three populations (Table 1).  
156 Thus, out of the initial 135,500 markers, a total of 102,129 markers passed all the QC filtering  
157 steps and were shared among the three populations.

158 In the PCA analysis, the first two eigenvectors, together, accounted for 29.2% of the  
159 total genetic variation and revealed three stratified populations (Figure 1). PCA1 included  
160 22.15% of the total genetic variation and generated the principal clusters to differentiate the  
161 three coho salmon populations, whereas PCA2 explained the variation present within each  
162 population.

163 The best K-value for admixture analysis was selected after performing several runs  
164 of MCMC for each K-value (ranging from 1 to 12), based on the posterior probability (Pr) of  
165 the fitted admixture model to the data with each K-value used (Pr(K)) [38]. The best K-value

166 was suggested to be  $K = 11$ . These results indicate that POP A and B shared a large proportion  
167 of their genome with each other, probably due to the similar origin of the base populations.  
168 In addition, Figure 2 indicates a higher admixture level for POP C, due to the recent cross  
169 between POP A and B to generate this population.

170

### 171 *3.2 Distribution of runs of homozygosity*

172 We identified ROH in all animals for coho salmon POP A and B, and in 103 out of  
173 108 individuals for POP C. A total of 3,250, 1,605, and 273 ROH and an average number of  
174  $36.93 \pm 7.13$ ,  $35.65 \pm 8.64$ ,  $2.65 \pm 1.27$  ROH per animal were identified for POP A, B and C,  
175 respectively. The mean ROH length was  $6.47 \pm 7.38$ ,  $7.172 \pm 7.69$  and  $2.58 \pm 2.07$  Mb for POP  
176 A, B and C, respectively (Table 2) and the longest segment identified was 61.82 Mb, found  
177 in chromosome 2 for POP B (Figure S1). The ROH analysis for different length classes  
178 suggests that for the three coho salmon populations the genome is mostly composed of a high  
179 number of short segments ( $\text{ROH}_{1-2 \text{ Mb}}$ ,  $\text{ROH}_{2-4 \text{ Mb}}$ ). No segment was found for  $\text{ROH}_{>16 \text{ Mb}}$  in  
180 POP C.

181 The number of ROH identified differs between chromosome and population. POP A  
182 has the highest number of ROH per chromosome, with more than 150 for chromosomes  
183 Okis5, Okis6 and Okis17. For POP B, chromosomes Okis5, Okis18 and Okis19 have more  
184 than 100 ROH, whereas for POP C, with the exception of chromosome Okis5, have less than  
185 50 per chromosomes (Figure 3). The average ROH length also differs between chromosomes  
186 and population. POP A has two chromosomes (Okis5 and Okis11) with ROH segments  
187 greater than 10 Mb. POP B has five chromosomes (Okis3, Okis4, Okis6, Okis11 and Okis14)  
188 with ROH segments greater than 10 Mb; while all chromosomes in POP C have ROH  
189 segments smaller than 7 Mb (Figure 4).



190 Figure 5 shows the relation between the total number of ROH and the total length of  
191 ROH for each animal across the three populations. A considerable difference between POP  
192 C and POP A or B was found. For POP C, all animals have a small number of ROH (<8)  
193 with total length <25 Mb, whereas most individuals in POP A and B have at least 20 ROHs  
194 with a total length >100 Mb, with some extreme individuals with segments covering more  
195 than 300 Mb. The number of ROHs and segment length per animal and per chromosome are  
196 shown in Figure S1. The high number of segments >10 Mb in Okis5, Okis6 and Okis28,  
197 especially for POP A and B, suggests recent events of inbreeding, whereas the small  
198 segments as in Okis20 for POP A and B, and for most of chromosomes for POP C, suggests  
199 more ancient inbreeding.

200

### 201 *3.3 Genomic- and pedigree-based inbreeding*

202 We used four different methods to estimate the inbreeding coefficient, from the  
203 information of 102K markers and pedigree data (Table 3). The average inbreeding coefficient  
204 estimated using ROH was different between ROH classes, the values decreased when the  
205 ROH length segments increased for all populations. The mean value for  $F_{ROH_{ALL}}$  was the  
206 same for both POP A and B (0.142 and 0.152, respectively), but it was significantly different  
207 ( $p < 0.05$ ) for POP C (0.004) when compared to POP A or B. The  $F_{HOM}$  resulted in the lowest  
208 inbreeding values ranging from -0.036 to -0.105 for POP A and C, respectively. The mean  
209 value for  $F_{GRM}$  was different ( $p < 0.05$ ) between the three populations, the highest and lowest  
210 values were reported for POP B and C, respectively, whereas the  $F_{PED}$  value was not different  
211 between POP A and B, but was significantly lower for POP C (0.002,  $p < 0.05$ ). Additionally,  
212 we calculated the inbreeding coefficient based on the ROH per chromosome (Figure 6). POP  
213 A and B had the most chromosomes with inbreeding values higher than 0.2, as in Okis5,

214 Okis6 and Okis28 for POP A, and Okis5, Okis12, Okis14, Okis18 and Okis26 for POP B,  
215 whereas lower values were found for POP C and for most of the chromosomes the inbreeding  
216 was equal to zero.

217 The Pearson correlation between different genomic methods to estimate the  
218 inbreeding coefficient suggested a high positive correlation ( $>0.82$ ,  $p<0.001$ ) for POP A and  
219 POP B (Figure 7 and 8, respectively). Correlation between different ROH length classes  
220 decreased in function with the comparison between shorter and longer segments, e.g. highest  
221 correlation between  $ROH_{1-2\text{ Mb}}$  and  $ROH_{2-4\text{ Mb}}$  and lowest between  $ROH_{1-2\text{ Mb}}$  and  $ROH_{>16\text{ Mb}}$ .  
222 The lowest correlation values among genomic methods was reported between  $ROH_{>16\text{ Mb}}$  and  
223 both  $ROH_{\text{HOM}}$  and  $ROH_{\text{GRM}}$ . In addition, for POP A and POP B correlation low correlation  
224 values were found, respectively, ranging from 0.35 to 0.39 ( $p<0.01$ ), between genomic  
225 methods and  $F_{\text{PED}}$ .

226 Different patterns of correlations were observed for POP C, compared to POP A and  
227 B, probably due to the low inbreeding level of this recently admixed population. Medium to  
228 high positive correlation was reported between the ROH classes (0.54 to 0.94,  $p<0.001$ ), and  
229 a correlation equal to unity was observed between  $ROH_{\text{HOM}}$  and  $ROH_{\text{GRM}}$ . For other  
230 correlations, small values (ranged from 0.28 to 0.34) or not different from zero were observed  
231 (Figure 9).

232

## 233 **4. Discussion**

### 234 *4.1 Genomic population structure*

235 The first two principal components explained more than 29% of the total genetic  
236 variation for the three populations studied, which were separated into three different clusters  
237 (Figure 1). The admixture results are in agreement with the recent event of hybridization of

238 POP A and B to generate POP C, where the genetic differentiation between POP A and B  
239 may have been be partly generated by differences in the base population, which can have a  
240 pronounced effect on allele frequencies [42]. In addition, considering that POP A and B have  
241 been independently selected by at least eight generations each, differences in the selection  
242 processes, as well as the environmental conditions and drift, may have influenced the  
243 differences observed in Figure 2.

244

#### 245 *4.2 Runs of homozygosity characterization*

246 Figure 3 and 4 show that independent of the population, the ROH patterns seem to be  
247 differentially distributed within specific genomic regions, same as the inbreeding values  
248 between chromosomes (Figure 6). The highest autozygosity, e.g. in chromosome Okis5 and  
249 Okis6 for POP A and B, is likely the consequence of artificial selection [26], considering that  
250 these populations have been under genetic selection for harvest weight for at least eight  
251 generations. A ROH study in humans [43] suggested that the homozygosity segments are  
252 more common in regions with high linkage disequilibrium (LD) and low recombination rates.  
253 Thus the highest mean levels of LD found in Okis5 and Okis6 in animals from the same  
254 populations [35] are in accordance with the two chromosomes with the highest number of  
255 ROH in the present study.

256 Differences in the number of ROH and segment length was observed within and  
257 across populations (Figure 5 and Additional file 1). The higher number of ROH in POP A  
258 compared to POP B is most likely due to higher sample size in the former, whereas the  
259 differences in ROH length between the three populations may be due to differences in the  
260 effective population size, selection intensities, or threshold of inbreeding allowed for the  
261 matings, suggesting that artificial selection commonly increases the autozygosity across the

262 genome and creates long ROH in specific regions of the genomes [26]. In contrast, the shorter  
263 segments and smaller number of ROH in POP C when compared against both POP A and B  
264 may be the result of recent population admixture between these populations. Furthermore,  
265 animals from the same population might have the same total ROH lengths but a variable  
266 number of segments, which is probably the result of different distances from common  
267 ancestors [25]. Interestingly, for both POP A and B, the length class ROH<sub>2-4 Mb</sub> has more  
268 ROH than ROH<sub>1-2 Mb</sub> (Table 2), which is different than what is commonly found in other  
269 species [15,44,45]. These differences can be due to the criteria adopted to identify ROH or  
270 an inherent characteristic of these populations. There is no consensus on the best parameters  
271 to characterize ROH patterns [32]; thus, here we used the minimum number of 50 SNPs and  
272 the length of 1 Mb to define a ROH segment. We chose the current parameters due to the  
273 historical demographics of coho salmon in Chile. The ROH<sub>2-4 Mb</sub> should date from about 20  
274 generations ago (approximately 40 years considering the generation interval of 2 years),  
275 which corresponds to the introduction of coho salmon in Chile at the end of the 1970s, to  
276 begin the establishment of Chilean brood stocks [2,35].

277

#### 278 *4.3 Genomics- and pedigree-based inbreeding*

279 Based on information of ROH length it is possible to infer the number of generations  
280 for inbreeding events [46]. The ROH due to ancient origin tend to be shorter, e.g. ROH<sub>1-2 Mb</sub>,  
281 ROH<sub>2-4 Mb</sub> and ROH<sub>4-8 Mb</sub> date from 50, 20 and 12.5 generations ago, respectively. In contrast,  
282 recent ROH are longer, due to the small probability of breaking down the segments that are  
283 identical-by-descent (IBD) by means of recombination events. Thus, the ROH<sub>8-16 Mb</sub> and  
284 ROH<sub>>16 Mb</sub> are dated to 6 and 3 generations ago, respectively [22,46]. For both POP A and B

285 it was possible to identify short and long segments in most of the animals analyzed, whereas  
286 in the POP C a small number of animals ( $n = 7$ ) presented  $ROH_{8-16\text{ Mb}}$  and none  $ROH_{>16\text{ Mb}}$ .

287 In recent years, some studies have investigated different genomic methods to estimate  
288 inbreeding coefficients in cattle [12,25,26,45,47,48], pigs [27,28,49,50], goats [51–53] and  
289 rainbow trout [32]. However, this is the first study aimed at characterizing the ROH patterns  
290 and comparing different genomic- and pedigree-based methods to estimate inbreeding  
291 coefficients in farmed coho salmon populations. Both genomic- and pedigree-based  
292 strategies have some advantages and disadvantages. The pedigree inbreeding coefficient, is  
293 a simple method that requires recording genealogy information, but does not account for the  
294 autozygosity differences among animals with the same inbreeding history. In contrast,  
295 genomic inbreeding can measure the realized inbreeding of an individual and incorporate the  
296 breeding history of the animal, including new mutations, ancient and contemporary  
297 inbreeding [27].

298 A comparison of inbreeding coefficients, showed  $F_{\text{GRM}}$  gave the highest values,  
299 especially for B and C, probably because the alleles IBD and identical by state (IBS) are not  
300 differentiated for  $F_{\text{GRM}}$  [12]. This result is in agreement with results previously found in  
301 humans, cattle, and simulation studies [12,15,16].  $F_{\text{HOM}}$  resulted in negative inbreeding  
302 values for all populations (Table 3), suggesting that the individuals have lower levels of  
303 homozygosity than expected in the reference population under Hardy-Weinberg equilibrium  
304 [54] and underestimated values should be expected [55]. The  $F_{\text{PED}}$  for POP A and POP B  
305 were smaller than values estimated using  $F_{\text{ROH}_{\text{ALL}}}$  and  $F_{\text{GRM}}$ , but are in accordance with the  
306 values estimated for the same populations using previous generations [8,10]. The  $F_{\text{PED}}$  can  
307 be easily underestimated when pedigree information of less than 20 generations is used [55].  
308 The difference between  $F_{\text{ROH}}$  and  $F_{\text{PED}}$  could be also due to the unknown pedigree

309 information before recording, which in practical terms means that inbreeding levels for  
310 founding animals were not zero.

311

#### 312 *4.4 Inbreeding coefficients correlations*

313 ROH can be identified for each animal, and the inbreeding coefficient will reflect the  
314 direct level of homozygosity, not influenced by allele frequencies [19]. Also with regard to  
315 information about recent and remote inbreeding [56]. High correlations ( $>0.80$ ) were found  
316 between FROH and other genomic inbreeding estimates for POP A and B (Figure 7 and 8).  
317 Some authors have also reported a strong or moderate correlation between genomics methods  
318 used to calculate inbreeding coefficients for different species [11,27,57,58].

319 The genomic-based inbreeding method correlated moderately or poorly with pedigree  
320 data, showing values lower than 0.39 (Figure 7 to 9). Similar weak or no correlation was  
321 reported for cattle [24,45,47], whereas a moderate to strong positive correlation was  
322 described by some authors [15,40,48,59]. An increase in the correlation between genomic-  
323 and pedigree-based inbreeding as the pedigree depth increases is expected [24]. Here we used  
324 the complete pedigree information of nine generations for both POP A and POP B, whereas  
325 for POP C a pedigree depth of eight generations was used. In a previous pedigree-based  
326 inbreeding study using the same broodstock population of POP A (7<sup>th</sup> generation) and POP  
327 B (8<sup>th</sup> generation), an increasing tendency for inbreeding values in the last four generations  
328 was reported for both populations [8] and a continued inbreeding accumulation until 9<sup>th</sup>  
329 generation used in our study is well-known. Thus, we expected a higher correlation between  
330 long ROH segments (ROH<sub>8-16 Mb</sub>, and ROH<sub>>16 Mb</sub>) and F<sub>PED</sub> values. The weak or no  
331 correlation may be explained by the depth of pedigree records [55], incorrect or incomplete  
332 pedigree information [47], the F<sub>PED</sub> that assumed the founder individuals are unrelated [12],

333 and the fact that  $F_{PED}$  does not consider the stochastic nature of recombination and the  
334 persistence of ancestral short segments through time, due to the lack of recombination in  
335 specific regions [11]. These facts suggest that the  $F_{PED}$  may not reflect true inbreeding values.  
336 Additionally, the population sample size must be representative to avoid population  
337 stratification [15,24] and to improve the correlation between genomic- and pedigree-based  
338 inbreeding. However, in our case, POP B is the population with the smallest sample size ( $n =$   
339 45), but was the only one that resulted in significant correlations (Figure 8). Various studies  
340 of ROH used similar or smaller sample size in livestock species and rainbow-trout  
341 [19,32,44,48].

342 A relatively large effective population size ( $N_e$ ) is recommended to maintain the  
343 control of inbreeding in the medium-term. However, decline in the historical  $N_e$  was reported  
344 for animals from the same population as POP A [35]. The reduction may be due to the  
345 prioritization of genetic gain using high selection pressure without putting strong control on  
346 the family contribution for each generation [8]. Consequently, mating close relatives is more  
347 probable, which results in a high level of inbreeding and the creation of long ROH segments  
348 for both POP A and B. Therefore, to increase the effective population size and to limit the  
349 inbreeding level [8], POP C was generated. According to our results, this strategy was  
350 effective in reducing the inbreeding levels and changing the patterns of ROH, clearly  
351 differentiating from POP A and B. These results are in accordance with some studies  
352 [15,48,60,61] that suggest that high heterogeneity populations due admixture or  
353 crossbreeding lines contributed to the breakdown of long homozygous segments and reduced  
354 the inbreeding levels in captive populations.

355

356 **5. Conclusion**

357           In this study, we found different numbers and lengths of runs of homozygosity in  
358 three coho salmon populations farmed in Chile. Moreover, the inbreeding coefficient  
359 estimated using genomic- or pedigree-based methods have varied among populations and the  
360 high correlations between genomic inbreeding methods suggest that these are the more  
361 accurate methods to estimate autozygosity levels and thus must be used as an alternative  
362 when pedigree information is inaccurate, incomplete or unavailable.

363

#### 364 **Acknowledgements**

365 We thank the government of Canada through Genome Canada, Genome British Columbia,  
366 and Genome Quebec to supported this research that was carried out in conjunction with the  
367 projected EPIC4 (Enhanced Production in Coho: Culture, Community, Catch).

368

#### 369 **Authors' contributions**

370 GMY performed the analysis and wrote the initial version of the manuscript. PC and RMN  
371 contribute with writing. BK develop the chip array. JMY conceived and designed the study;  
372 contributed to the discussion and writing. All authors have reviewed and approved the  
373 manuscript.

374

#### 375 **Competing interests**

376           The authors declare that the research was conducted in the absence of any commercial  
377 or financial relationships that could be construed as a potential conflict of interest.

378



## References

1. Groot, C. (Cornelis); Margolis, L. *Pacific salmon life histories*; UBC Press, 1991; ISBN 9780774803595.
2. Neira, R.; Lhorente, J.P.; Yáñez, J.M.; Araneda, M.; Filp, M. Evolution of Coho Salmon (*Oncorhynchus kisutch*) Breeding Programs. In Proceedings of the 10th World Congress of Genetics Applied to Livestock Production; Vancouver, 2010; pp. 1–6.
3. Lhorente, J.P.; Araneda, M.; Neira, R.; Yáñez, J.M. Advances in genetic improvement for salmon and trout aquaculture: the Chilean situation and prospects. *Rev. Aquac.* **2019**, *11*, 340–353.
4. Gjedrem, T. Genetic improvement of cold-water fish species. *Aquac. Res.* **2000**, *31*, 25–33.
5. Gjedrem, T.; Robinson, N.; Rye, M. The importance of selective breeding in aquaculture to meet future demands for animal protein: A review. *Aquaculture* **2012**, *350–353*, 117–129.
6. Howard, J.T.; Pryce, J.E.; Baes, C.; Maltecca, C. Invited review: Inbreeding in the genomics era: Inbreeding, inbreeding depression, and management of genomic variability. *J. Dairy Sci.* **2017**, *100*, 6009–6024.
7. Gallardo, A.; Garcá, X.; Paul, J.; Neira, R. Inbreeding and inbreeding depression of female reproductive traits in two populations of Coho salmon selected using BLUP predictors of breeding values. **2004**, *234*, 111–122.
8. Yáñez, J.M.; Bassini, L.N.; Filp, M.; Lhorente, J.P.; Ponzoni, R.W.; Neira, R. Inbreeding and effective population size in a coho salmon (*Oncorhynchus kisutch*) breeding nucleus in Chile. *Aquaculture* **2014**, *420–421*, S15–S19.

9. Ponzoni, R.W.; Khaw, H.L.; Nguyen, N.H.; Hamzah, A. Inbreeding and effective population size in the Malaysian nucleus of the GIFT strain of Nile tilapia (*Oreochromis niloticus*). *Aquaculture* **2010**, *302*, 42–48.
10. Yoshida, G.M.; Yáñez, J.M.; de Oliveira, C.A.L.; Ribeiro, R.P.; Lhorente, J.P.; de Queiroz, S.A.; Carvalheiro, R. Mate selection in aquaculture breeding using differential evolution algorithm. *Aquac. Res.* **2017**, *48*.
11. Ferenčaković, M.; Hamzić, E.; Gredler, B.; Solberg, T.R.; Klemetsdal, G.; Curik, I.; Sölkner, J. Estimates of autozygosity derived from runs of homozygosity: empirical evidence from selected cattle populations. *J. Anim. Breed. Genet.* **2013**, *130*, 286–293.
12. Forutan, M.; Ansari Mahyari, S.; Baes, C.; Melzer, N.; Schenkel, F.S.; Sargolzaei, M. Inbreeding and runs of homozygosity before and after genomic selection in North American Holstein cattle. *BMC Genomics* **2018**, *19*, 98.
13. Cassell, B.G.; Adamec, V.; Pearson, R.E. Effect of Incomplete Pedigrees on Estimates of Inbreeding and Inbreeding Depression for Days to First Service and Summit Milk Yield in Holsteins and Jerseys. *J. Dairy Sci.* **2003**, *86*, 2967–2976.
14. VanRaden, P.M. Efficient Methods to Compute Genomic Predictions. *J. Dairy Sci.* **2008**, *91*, 4414–4423.
15. Marras, G.; Gaspa, G.; Sorbolini, S.; Dimauro, C.; Ajmone-Marsan, P.; Valentini, A.; Williams, J.L.; Macciotta, N.P.P. Analysis of runs of homozygosity and their relationship with inbreeding in five cattle breeds farmed in Italy. *Anim. Genet.* **2015**, *46*, 110–121.
16. McQuillan, R.; Leutenegger, A.-L.; Abdel-Rahman, R.; Franklin, C.S.; Pericic, M.; Barac-Lauc, L.; Smolej-Narancic, N.; Janicijevic, B.; Polasek, O.; Tenesa, A.; et al. Runs of Homozygosity in European Populations. *Am. J. Hum. Genet.* **2008**, *83*, 359–

372.

17. Brüniche-Olsen, A.; Kellner, K.F.; Anderson, C.J.; DeWoody, J.A. Runs of homozygosity have utility in mammalian conservation and evolutionary studies. *Conserv. Genet.* **2018**, *19*, 1295–1307.
18. Peripolli, E.; Munari, D.P.; Silva, M.V.G.B.; Lima, A.L.F.; Irgang, R.; Baldi, F. Runs of homozygosity: current knowledge and applications in livestock. *Anim. Genet.* **2017**, *48*, 255–271.
19. Signer-Hasler, H.; Burren, A.; Neuditschko, M.; Frischknecht, M.; Garrick, D.; Stricker, C.; Gredler, B.; Bapst, B.; Flury, C. Population structure and genomic inbreeding in nine Swiss dairy cattle populations. *Genet. Sel. Evol.* **2017**, *49*, 83.
20. MacLeod, I.M.; Larkin, D.M.; Lewin, H.A.; Hayes, B.J.; Goddard, M.E. Inferring demography from runs of homozygosity in whole-genome sequence, with correction for sequence errors. *Mol. Biol. Evol.* **2013**, *30*, 2209–23.
21. Sams, A.J.; Boyko, A.R. Fine-Scale Resolution of Runs of Homozygosity Reveal Patterns of Inbreeding and Substantial Overlap with Recessive Disease Genotypes in Domestic Dogs. *G3 (Bethesda)*. **2019**, *9*, 117–123.
22. Kirin, M.; McQuillan, R.; Franklin, C.S.; Campbell, H.; McKeigue, P.M.; Wilson, J.F. Genomic Runs of Homozygosity Record Population History and Consanguinity. *PLoS One* **2010**, *5*, e13996.
23. Nothnagel, M.; Lu, T.T.; Kayser, M.; Krawczak, M. Genomic and geographic distribution of SNP-defined runs of homozygosity in Europeans. *Hum. Mol. Genet.* **2010**, *19*, 2927–35.
24. Gurgul, A.; Szmatoła, T.; Topolski, P.; Jasielczuk, I.; Żukowski, K.; Bugno-Poniewierska, M. The use of runs of homozygosity for estimation of recent inbreeding

- in Holstein cattle. *J. Appl. Genet.* **2016**, *57*, 527–530.
25. Mészáros, G.; Boison, S.A.; Pérez O'Brien, A.M.; Ferenčaković, M.; Curik, I.; Da Silva, M.V.B.; Utsunomiya, Y.T.; Garcia, J.F.; Sölkner, J. Genomic analysis for managing small and endangered populations: a case study in Tyrol Grey cattle. *Front. Genet.* **2015**, *6*, 173.
  26. Kim, E.-S.; Cole, J.B.; Huson, H.; Wiggans, G.R.; Van Tassell, C.P.; Crooker, B.A.; Liu, G.; Da, Y.; Sonstegard, T.S. Effect of Artificial Selection on Runs of Homozygosity in U.S. Holstein Cattle. *PLoS One* **2013**, *8*, e80813.
  27. Gomez-Raya, L.; Rodríguez, C.; Barragán, C.; Silió, L. Genomic inbreeding coefficients based on the distribution of the length of runs of homozygosity in a closed line of Iberian pigs. *Genet. Sel. Evol.* **2015**, *47*, 81.
  28. Xu, Z.; Sun, H.; Zhang, Z.; Zhao, Q.; Olasege, B.S.; Li, Q.; Yue, Y.; Ma, P.; Zhang, X.; Wang, Q.; et al. Assessment of Autozygosity Derived From Runs of Homozygosity in Jinhua Pigs Disclosed by Sequencing Data. *Front. Genet.* **2019**, *10*, 274.
  29. Ai, H.; Huang, L.; Ren, J. Genetic Diversity, Linkage Disequilibrium and Selection Signatures in Chinese and Western Pigs Revealed by Genome-Wide SNP Markers. *PLoS One* **2013**, *8*, e56001.
  30. Beynon, S.E.; Slavov, G.T.; Farré, M.; Sunduimijid, B.; Waddams, K.; Davies, B.; Haresign, W.; Kijas, J.; MacLeod, I.M.; Newbold, C.J.; et al. Population structure and history of the Welsh sheep breeds determined by whole genome genotyping. *BMC Genet.* **2015**, *16*.
  31. Manunza, A.; Noce, A.; Serradilla, J.M.; Goyache, F.; Martínez, A.; Capote, J.; Delgado, J.V.; Jordana, J.; Muñoz, E.; Molina, A.; et al. A genome-wide perspective

- about the diversity and demographic history of seven Spanish goat breeds. *Genet. Sel. Evol.* **2016**, *48*.
32. D'Ambrosio, J.; Phocas, F.; Haffray, P.; Bestin, A.; Brard-Fudulea, S.; Poncet, C.; Quillet, E.; Dechamp, N.; Fraslin, C.; Charles, M.; et al. Genome-wide estimates of genetic diversity, inbreeding and effective size of experimental and commercial rainbow trout lines undergoing selective breeding. *Genet. Sel. Evol.* **2019**, *51*, 26.
33. Yáñez, J.M.; Bangera, R.; Lhorente, J.P.; Oyarzún, M.; Neira, R. Quantitative genetic variation of resistance against *Piscirickettsia salmonis* in Atlantic salmon (*Salmo salar*). *Aquaculture* **2013**, *414–415*, 155–159.
34. Yáñez, J.M.; Lhorente, J.P.; Bassini, L.N.; Oyarzún, M.; Neira, R.; Newman, S. Genetic co-variation between resistance against both *Caligus rogercresseyi* and *Piscirickettsia salmonis*, and body weight in Atlantic salmon (*Salmo salar*). *Aquaculture* **2014**, *433*, 295–298.
35. Barria, A.; Christensen, K.A.; Yoshida, G.; Jedlicki, A.; Leong, J.S.; Rondeau, E.B.; Lhorente, J.P.; Koop, B.F.; Davidson, W.S.; Yáñez, J.M. Whole genome linkage disequilibrium and effective population size in a coho salmon (*Oncorhynchus kisutch*) breeding population using a high density SNP array. *Front. Genet.* **2019**, *10*, 498.
36. Purcell, S.; Neale, B.; Todd-Brown, K.; Thomas, L.; Ferreira, M.A.R.; Bender, D.; Maller, J.; Sklar, P.; de Bakker, P.I.W.; Daly, M.J.; et al. PLINK: A tool set for whole-genome association and population-based linkage analyses. *Am. J. Hum. Genet.* **2007**, *81*, 559–575.
37. R Core Team R: A Language and Environment for Statistical Computing; R Foundation for Statistical Computing: Vienna, Austria, 2015. 2016.
38. Pritchard, J.K.; Stephens, M.; Rosenberg, N.A.; Donnelly, P. Association Mapping in

- Structured Populations. *Am. J. Hum. Genet.* **2000**, *67*, 170–181.
39. Biscarini, F.; Cozzi, P.; Gaspa, G.; Marras, G. Detect Runs of Homozygosity and Runs of Heterozygosity in Diploid Genomes 2018.
40. McQuillan, R.; Leutenegger, A.-L.; Abdel-Rahman, R.; Franklin, C.S.; Pericic, M.; Barac-Lauc, L.; Smolej-Narancic, N.; Janicijevic, B.; Polasek, O.; Tenesa, A.; et al. Runs of Homozygosity in European Populations. *Am. J. Hum. Genet.* **2008**, *83*, 359–372.
41. Legarra, A.; Aguilar, I.; Misztal, I. A relationship matrix including full pedigree and genomic information. *J. Dairy Sci.* **2009**, *92*, 4656–4663.
42. Allendorf, F.W.; Phelps, S.R. Loss of Genetic Variation in a Hatchery Stock of Cutthroat Trout. *Trans. Am. Fish. Soc.* **1980**, *109*, 537–543.
43. Gibson, J.; Morton, N.E.; Collins, A. Extended tracts of homozygosity in outbred human populations. *Hum. Mol. Genet.* **2006**, *15*, 789–795.
44. Goszczynski, D.; Molina, A.; Terán, E.; Morales-Durand, H.; Ross, P.; Cheng, H.; Giovambattista, G.; Demyda-Peyrás, S. Runs of homozygosity in a selected cattle population with extremely inbred bulls: Descriptive and functional analyses revealed highly variable patterns. *PLoS One* **2018**, *13*, e0200069.
45. Peripolli, E.; Stafuzza, N.B.; Munari, D.P.; Lima, A.L.F.; Irgang, R.; Machado, M.A.; Panetto, J.C. do C.; Ventura, R.V.; Baldi, F.; da Silva, M.V.G.B. Assessment of runs of homozygosity islands and estimates of genomic inbreeding in Gyr (*Bos indicus*) dairy cattle. *BMC Genomics* **2018**, *19*, 34.
46. Broman, K.W.; Weber, J.L. Long Homozygous Chromosomal Segments in Reference Families from the Centre d'Étude du Polymorphisme Humain. *Am. J. Hum. Genet.* **1999**, *65*, 1493–1500.

47. Zhang, Q.; Calus, M.P.; Guldbrandtsen, B.; Lund, M.S.; Sahana, G. Estimation of inbreeding using pedigree, 50k SNP chip genotypes and full sequence data in three cattle breeds. *BMC Genet.* **2015**, *16*, 88.
48. Purfield, D.C.; Berry, D.P.; McParland, S.; Bradley, D.G. Runs of homozygosity and population history in cattle. *BMC Genet.* **2012**, *13*, 70.
49. Zhang, Z.; Zhang, Q.; Xiao, Q.; Sun, H.; Gao, H.; Yang, Y.; Chen, J.; Li, Z.; Xue, M.; Ma, P.; et al. Distribution of runs of homozygosity in Chinese and Western pig breeds evaluated by reduced-representation sequencing data. *Anim. Genet.* **2018**, *49*, 579–591.
50. Howard, J.T.; Tiezzi, F.; Huang, Y.; Gray, K.A.; Maltecca, C. Characterization and management of long runs of homozygosity in parental nucleus lines and their associated crossbred progeny. *Genet. Sel. Evol.* **2016**, *48*, 91.
51. Cardoso, T.F.; Amills, M.; Bertolini, F.; Rothschild, M.; Marras, G.; Boink, G.; Jordana, J.; Capote, J.; Carolan, S.; Hallsson, J.H.; et al. Patterns of homozygosity in insular and continental goat breeds. *Genet. Sel. Evol.* **2018**, *50*, 56.
52. Bertolini, F.; Cardoso, T.F.; Marras, G.; Nicolazzi, E.L.; Rothschild, M.F.; Amills, M. Genome-wide patterns of homozygosity provide clues about the population history and adaptation of goats. *Genet. Sel. Evol.* **2018**, *50*, 59.
53. Onzima, R.B.; Upadhyay, M.R.; Doekes, H.P.; Brito, L.F.; Bosse, M.; Kanis, E.; Groenen, M.A.M.; Crooijmans, R.P.M.A. Genome-Wide Characterization of Selection Signatures and Runs of Homozygosity in Ugandan Goat Breeds. *Front. Genet.* **2018**, *9*, 318.
54. Wang, J. Marker-based estimates of relatedness and inbreeding coefficients: an assessment of current methods. *J. Evol. Biol.* **2014**, *27*, 518–530.

55. Kardos, M.; Luikart, G.; Allendorf, F.W. Measuring individual inbreeding in the age of genomics: marker-based measures are better than pedigrees. *Heredity (Edinb)*. **2015**, *115*, 63–72.
56. Curik, I.; Ferenčaković, M.; Sölkner, J. Inbreeding and runs of homozygosity: A possible solution to an old problem. *Livest. Sci.* **2014**, *166*, 26–34.
57. Mastrangelo, S.; Tolone, M.; Di Gerlando, R.; Fontanesi, L.; Sardina, M.T.; Portolano, B. Genomic inbreeding estimation in small populations: evaluation of runs of homozygosity in three local dairy cattle breeds. *animal* **2016**, *10*, 746–754.
58. Sumreddee, P.; Toghiani, S.; Hay, E.H.; Roberts, A.; Agrrey, S.E.; Rekaya, R. Inbreeding depression in line Hereford cattle population using pedigree and genomic information. *J. Anim. Sci.* **2019**, *97*, 1–18.
59. Zavarez, L.B.; Utsunomiya, Y.T.; Carmo, A.S.; Neves, H.H.R.; Brien, A.M.P.O.; Curik, I.; Cole, J.B.; Carvalheiro, R.; Feren, M.; Tassell, V.; et al. Assessment of autozygosity in Nellore cows ( *Bos indicus* ) through high-density SNP genotypes. **2015**, *6*, 1–8.
60. Howard, J.T.; Tiezzi, F.; Huang, Y.; Gray, K.A.; Maltecca, C. Characterization and management of long runs of homozygosity in parental nucleus lines and their associated crossbred progeny. *Genet. Sel. Evol.* **2016**, *48*, 91.
61. Bertolini, F.; Cardoso, T.F.; Marras, G.; Nicolazzi, E.L.; Rothschild, M.F.; Amills, M. Genome-wide patterns of homozygosity provide clues about the population history and adaptation of goats. *Genet. Sel. Evol.* **2018**, *50*, 59.



**Table 1.** Number of runs of homozygosity (nROH), length (Mb) and standard deviation (SD in Mb) considered all ROH and by classes and for each salmon coho population.

| Class                          | POP A |             |       | POP B |             |       | POP C |             |       |
|--------------------------------|-------|-------------|-------|-------|-------------|-------|-------|-------------|-------|
|                                | nROH  | Mean length | SD    | nROH  | Mean length | SD    | nROH  | Mean length | SD    |
| <b>ROH<sub>ALL</sub></b>       | 3568  | 5.965       | 7.23  | 1624  | 6.695       | 7.668 | 495   | 3.319       | 3.921 |
| <b>ROH<sub>1-2 Mb</sub></b>    | 1165  | 1.284       | 0.389 | 468   | 1.286       | 0.370 | 298   | 1.193       | 0.360 |
| <b>ROH<sub>2-4 Mb</sub></b>    | 937   | 2.886       | 0.577 | 400   | 2.831       | 0.530 | 86    | 2.869       | 0.550 |
| <b>ROH<sub>4-8 Mb</sub></b>    | 680   | 5.585       | 1.069 | 310   | 5.547       | 1.015 | 74    | 5.337       | 1.170 |
| <b>ROH<sub>8-16 Mb</sub></b>   | 463   | 11.308      | 2.323 | 260   | 11.427      | 2.248 | 24    | 11.722      | 1.884 |
| <b>ROH<sub>&gt;16 Mb</sub></b> | 323   | 24.925      | 7.676 | 186   | 23.916      | 8.249 | 13    | 20.443      | 4.056 |

**Table 2.** Number of individuals (n), estimated of mean and standard deviation (SD) of inbreeding coefficient using runs of homozygosity (ROH) for different ROH length, based on excess of homozygosity ( $F_{HOM}$ ), genomic relationship matrix ( $F_{GRM}$ ) and pedigree-based relationship matrix ( $F_{PED}$ ),

| Class                          | POP A |                    |       | POP B |                    |       | POP C |                    |       |
|--------------------------------|-------|--------------------|-------|-------|--------------------|-------|-------|--------------------|-------|
|                                | n     | Mean               | SD    | n     | Mean               | SD    | n     | Mean               | SD    |
| <b>ROH<sub>ALL</sub></b>       | 88    | 0.143              | 0.038 | 45    | 0.143              | 0.062 | 108   | 0.009              | 0.002 |
| <b>ROH<sub>1-2 Mb</sub></b>    | 88    | 0.120              | 0.143 | 45    | 0.143              | 0.061 | 102   | 0.009              | 0.022 |
| <b>ROH<sub>2-4 Mb</sub></b>    | 88    | 0.113              | 0.133 | 41    | 0.142              | 0.053 | 51    | 0.009              | 0.024 |
| <b>ROH<sub>4-8 Mb</sub></b>    | 88    | 0.100              | 0.115 | 43    | 0.126              | 0.050 | 42    | 0.011              | 0.026 |
| <b>ROH<sub>8-16 Mb</sub></b>   | 86    | 0.081              | 0.090 | 41    | 0.107              | 0.042 | 11    | 0.030              | 0.035 |
| <b>ROH<sub>&gt;16 Mb</sub></b> | 88    | 0.051              | 0.056 | 41    | 0.064              | 0.036 | 4     | 0.039              | 0.025 |
| <b>F<sub>HOM</sub></b>         | 88    | -0.036             | 0.048 | 41    | -0.058             | 0.082 | 108   | -0.106             | 0.028 |
| <b>F<sub>GRM</sub></b>         | 88    | 0.145 <sup>b</sup> | 0.037 | 45    | 0.193 <sup>a</sup> | 0.040 | 108   | 0.051 <sup>c</sup> | 0.009 |
| <b>F<sub>PED</sub></b>         | 88    | 0.071              | 0.021 | 45    | 0.081              | 0.014 | 108   | 0.000              | 0.000 |

**Figure 1.** Principal component analysis of the autosomal genotypic data of three coho salmon populations.

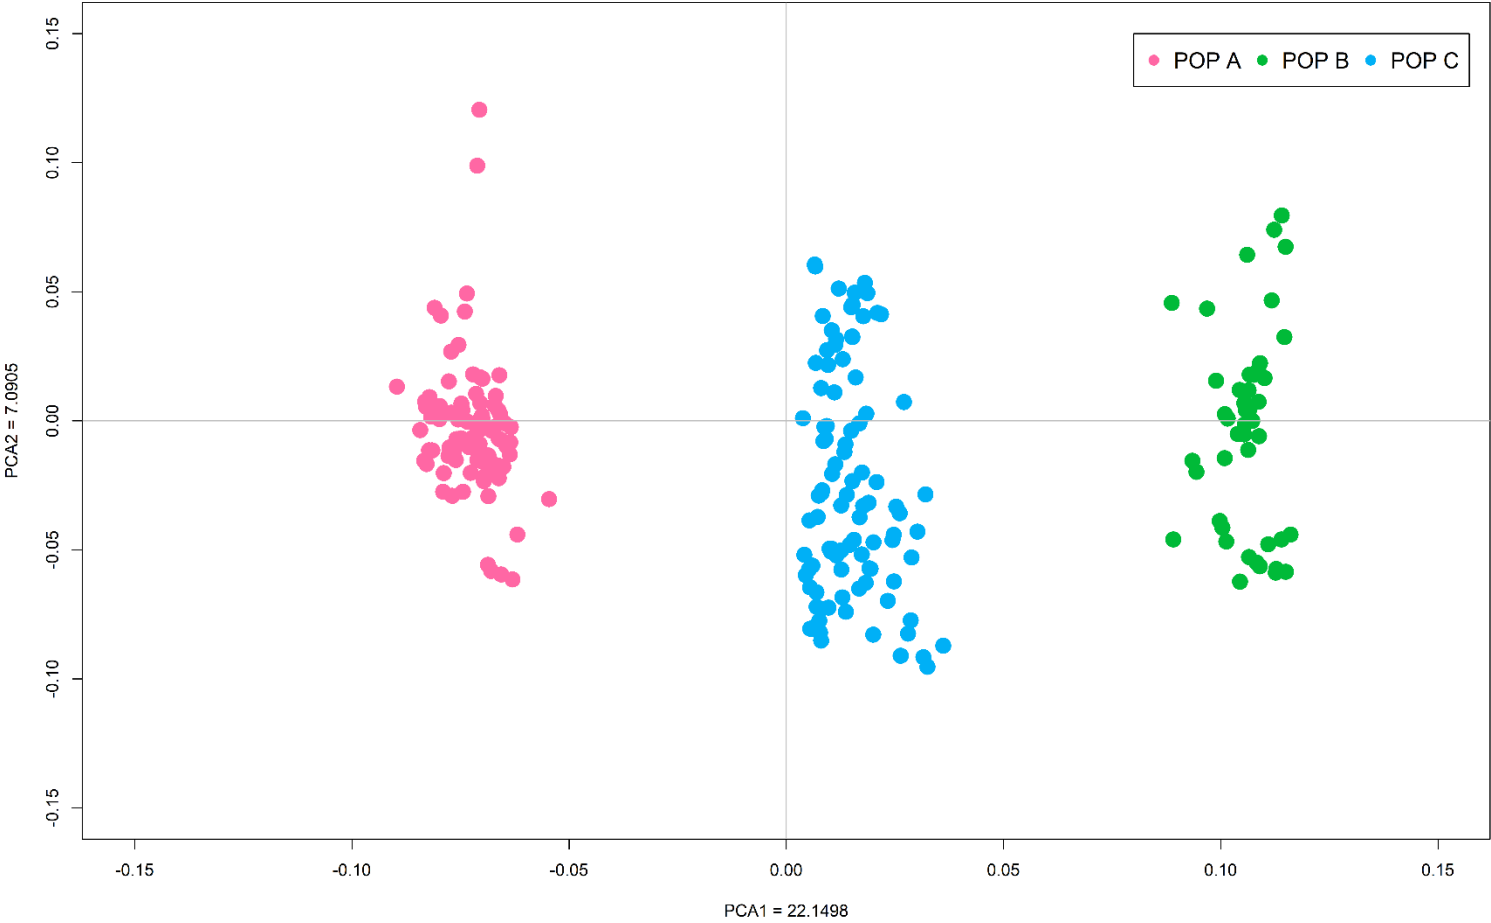

**Figure 2.** Admixture clustering of the three coho salmon population for  $K = 11$ .

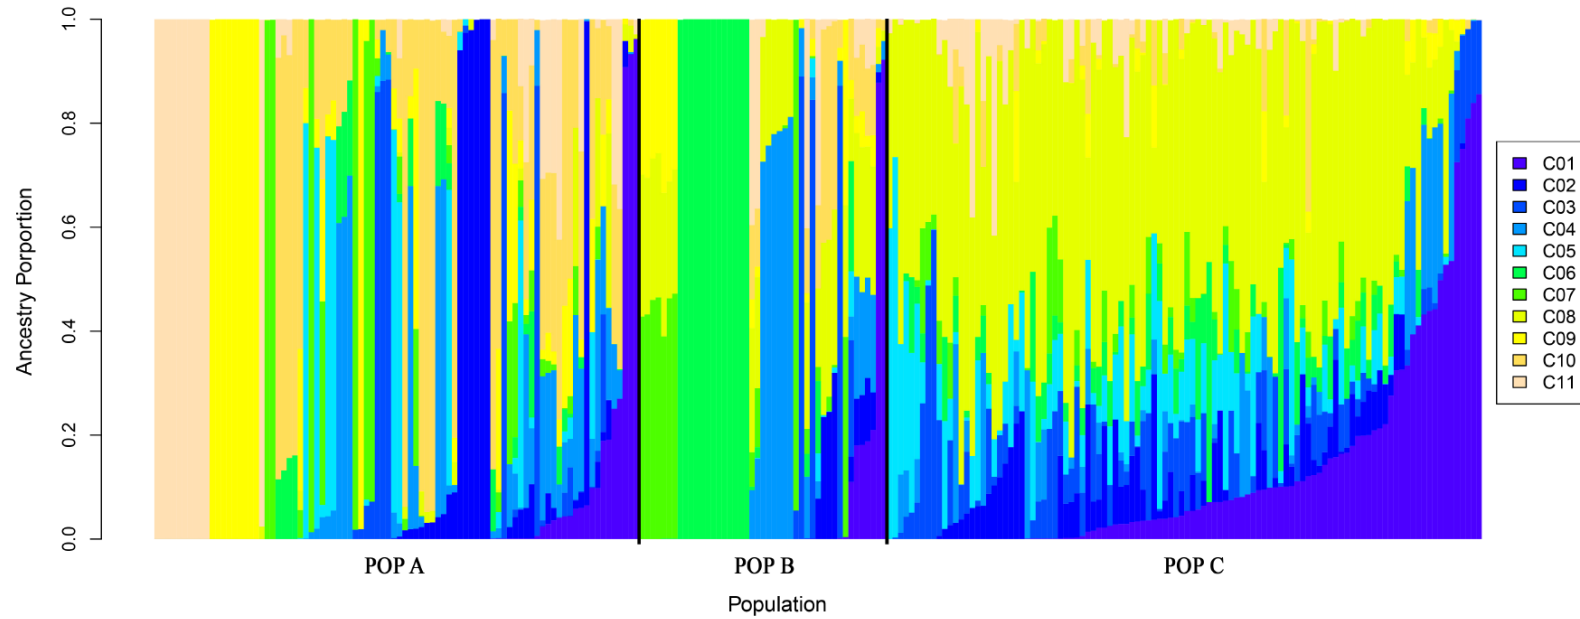

Each vertical line represent an animal and the black vertical lines were used to separate different populations.

**Figure 3.** Distribution of number of runs of homozygosity (ROH) for each chromosome in three coho salmon populations.

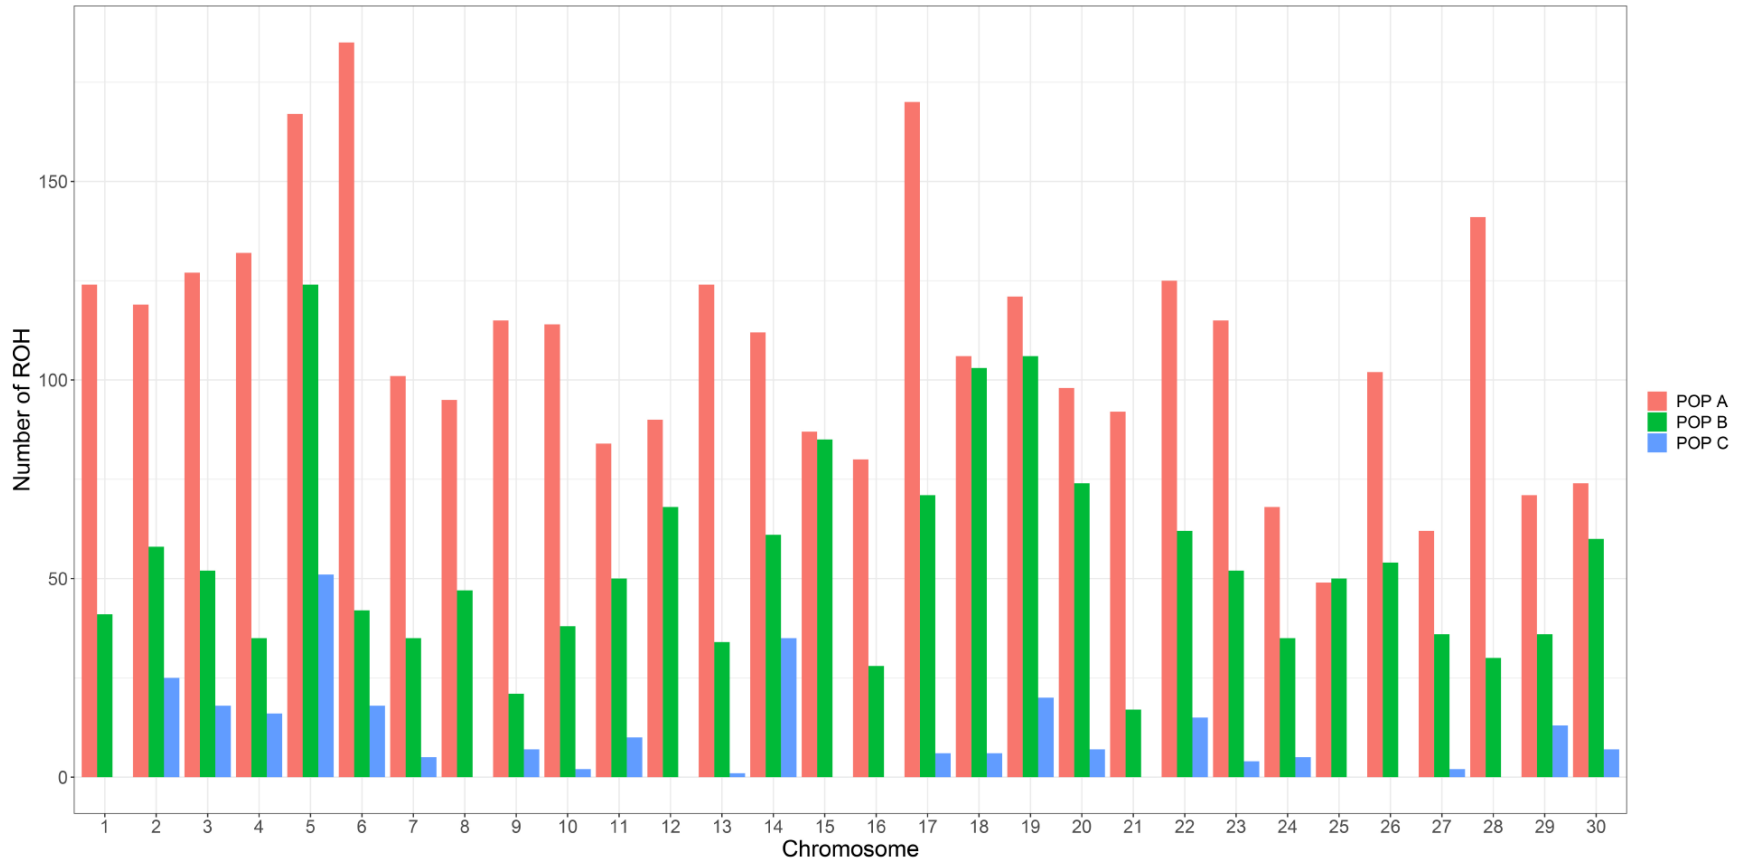

**Figure 4.** Average runs of homozygosity (ROH) length and standard error bars for each chromosome in three coho salmon populations.

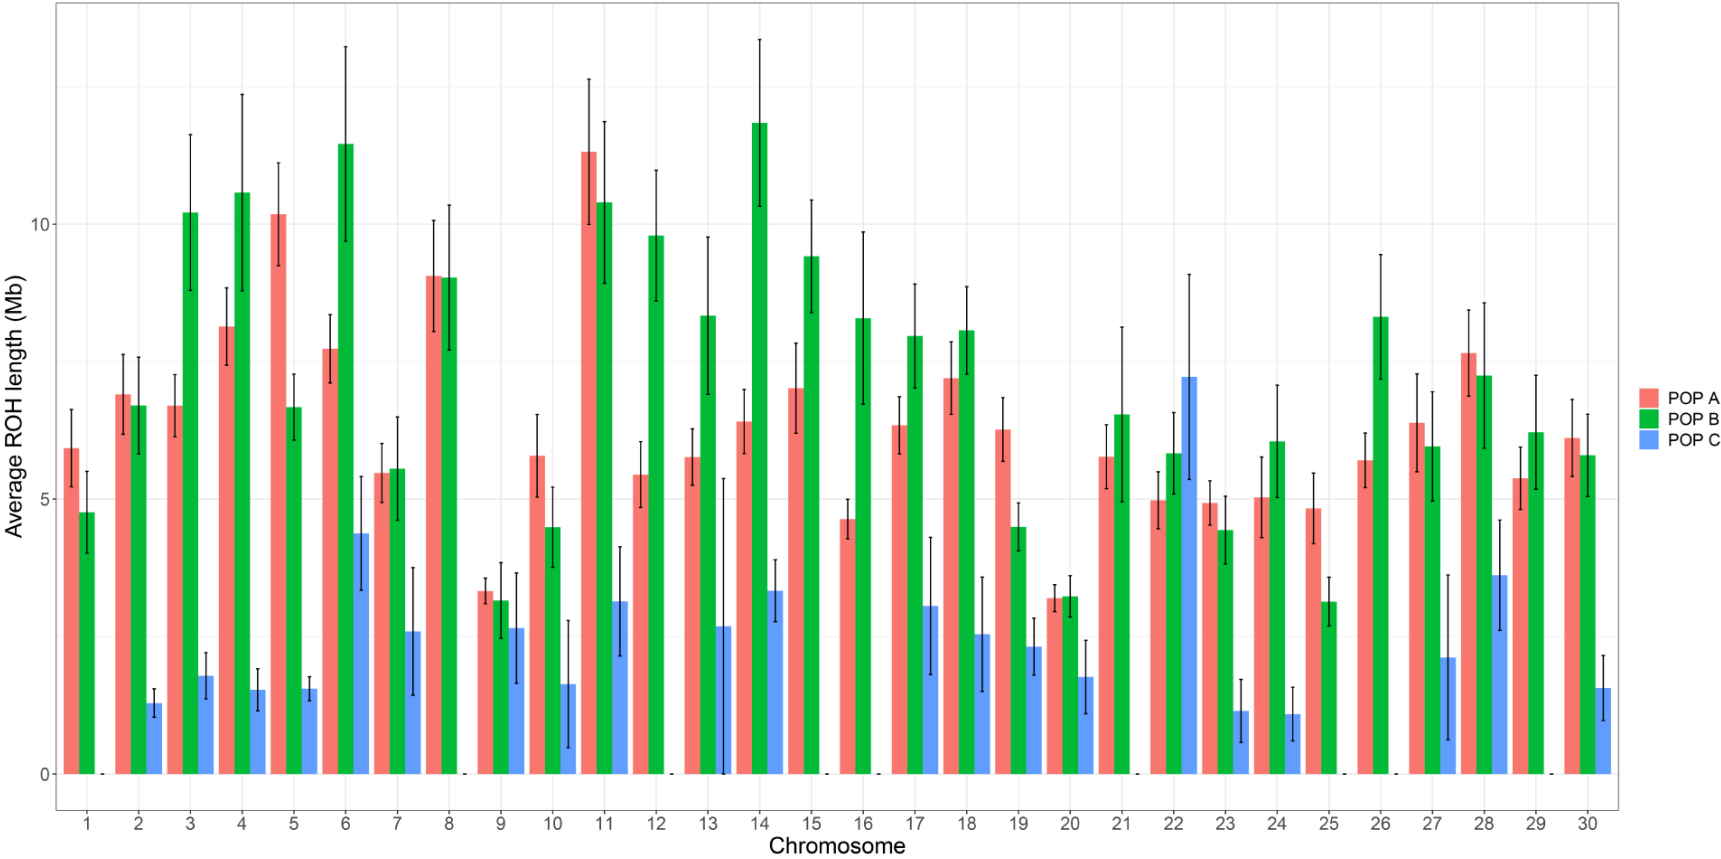

**Figure 5.** Relationship between the number of runs of homozygosity (ROH) and total length of ROH (Mb) per individual from each population.

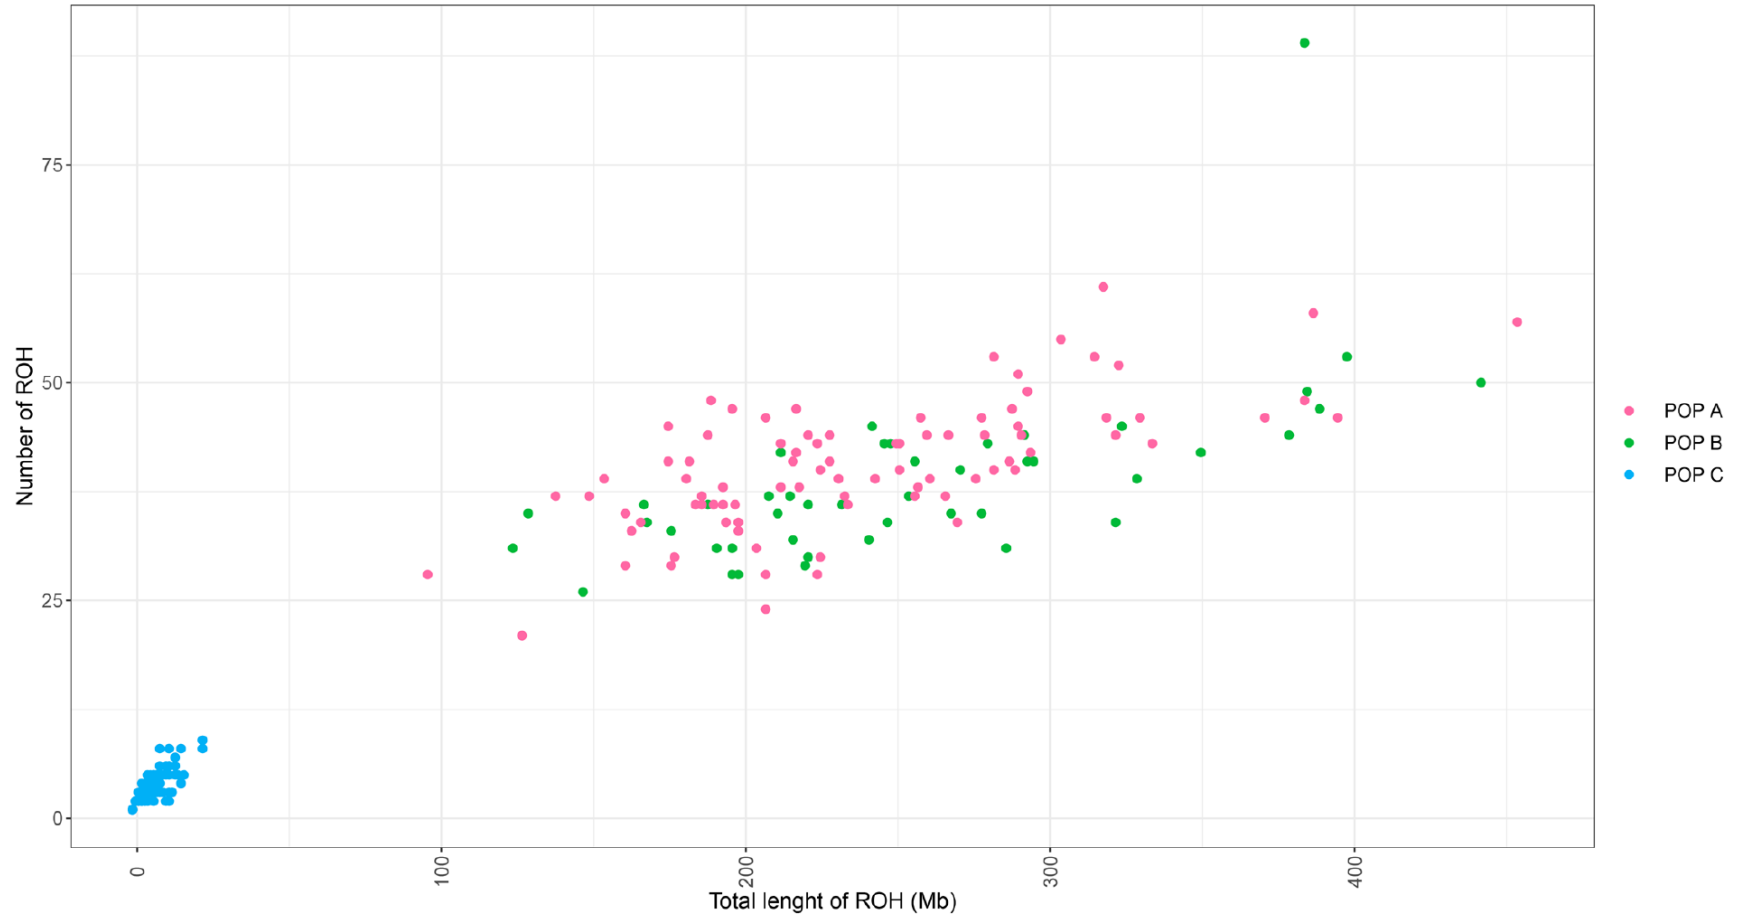

**Figure 6.** Distribution of inbreeding coefficients estimated using runs of homozygosity (ROH) for each chromosome in three coho salmon populations. Standard error bars were computed among individuals from the same population.

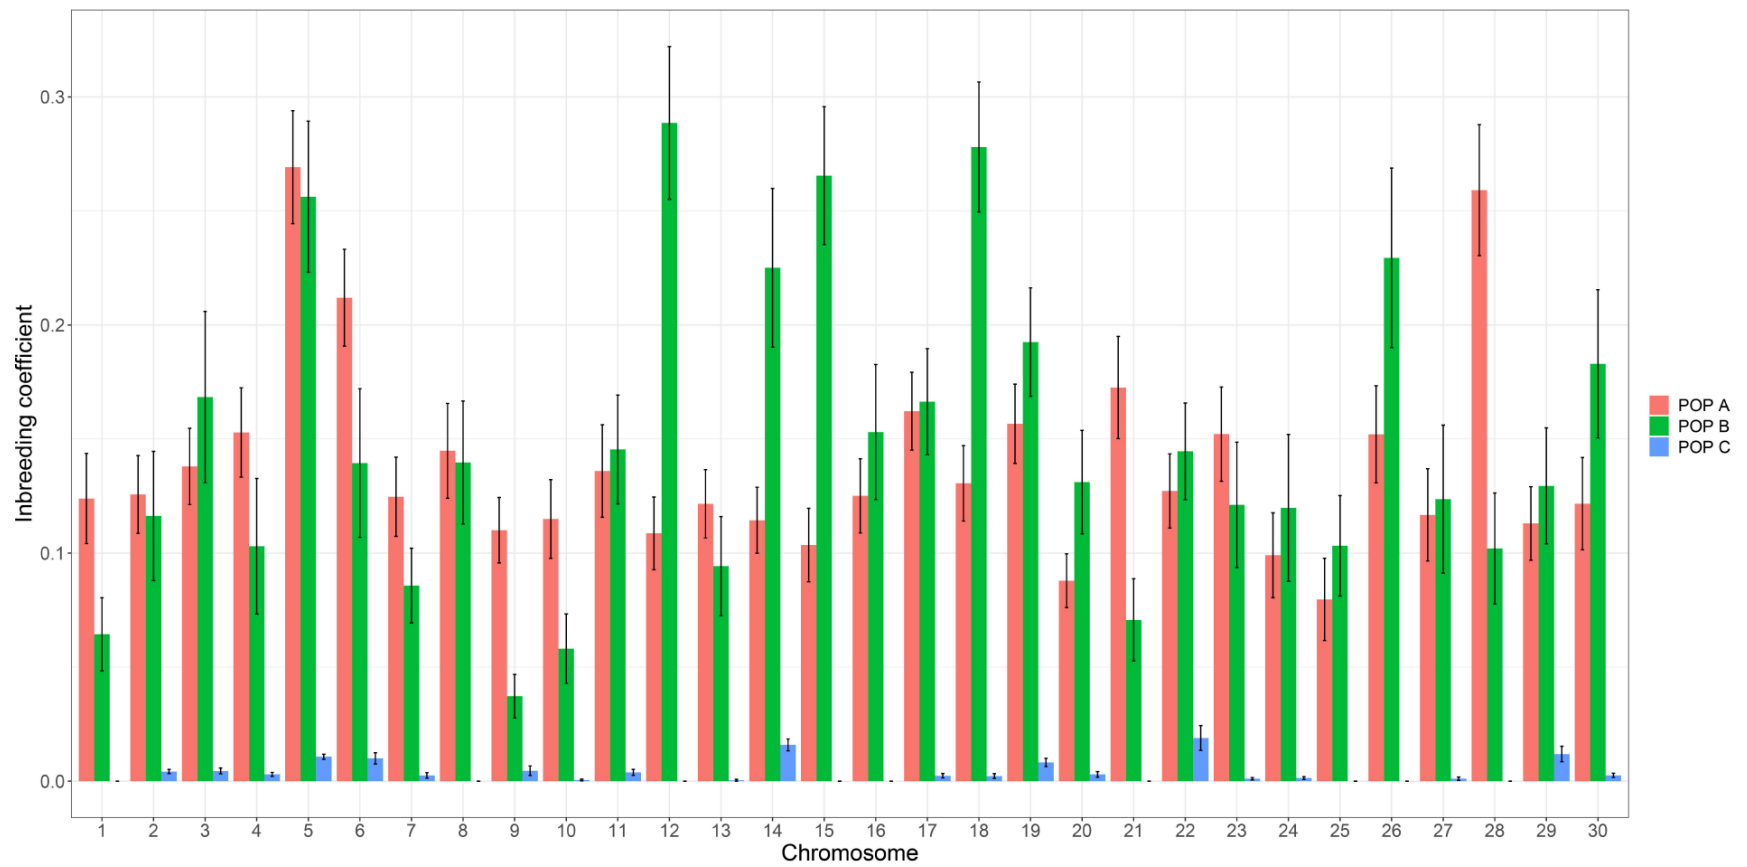





**Figure 8.** Scatterplots (lower panel) and Pearson correlations (upper panel) of genomic inbreeding coefficients using runs of homozygosity (ROH) for different ROH length, based on excess of homozygosity ( $F_{\text{HOM}}$ ), genomic relationship matrix ( $F_{\text{GRM}}$ ) and pedigree-based relationship matrix ( $F_{\text{PED}}$ ) for POP B.

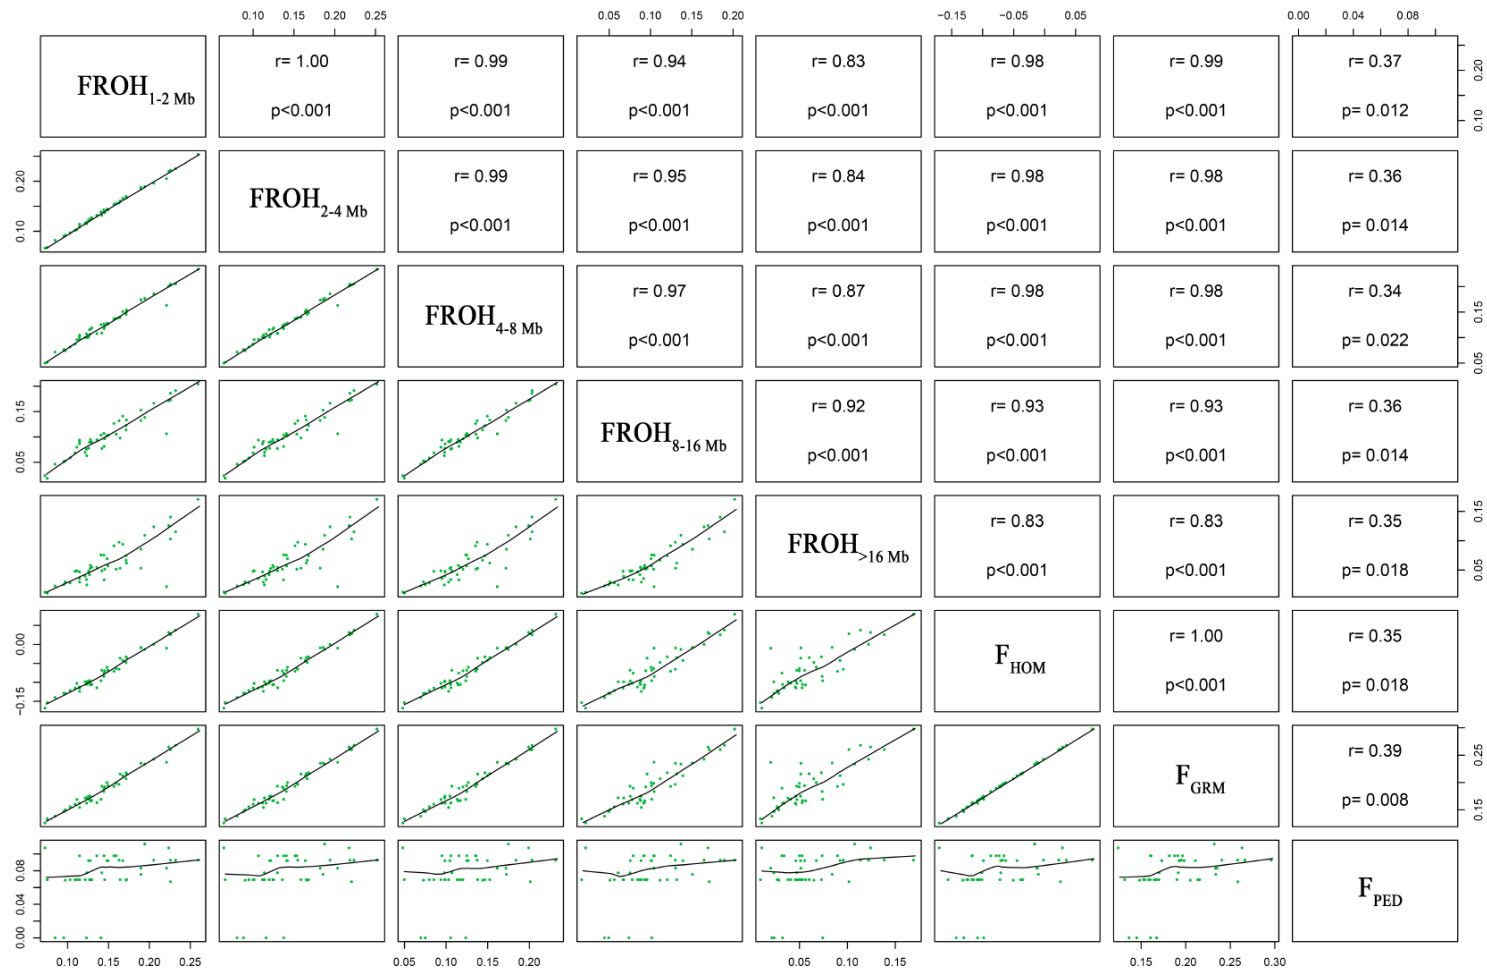

**Figure 9.** Scatterplots (lower panel) and Pearson correlations (upper panel) of genomic inbreeding coefficients using runs of homozygosity (ROH) for different ROH length, based on excess of homozygosity ( $F_{\text{HOM}}$ ), genomic relationship matrix ( $F_{\text{GRM}}$ ) and pedigree-based relationship matrix ( $F_{\text{PED}}$ ) for POP C.

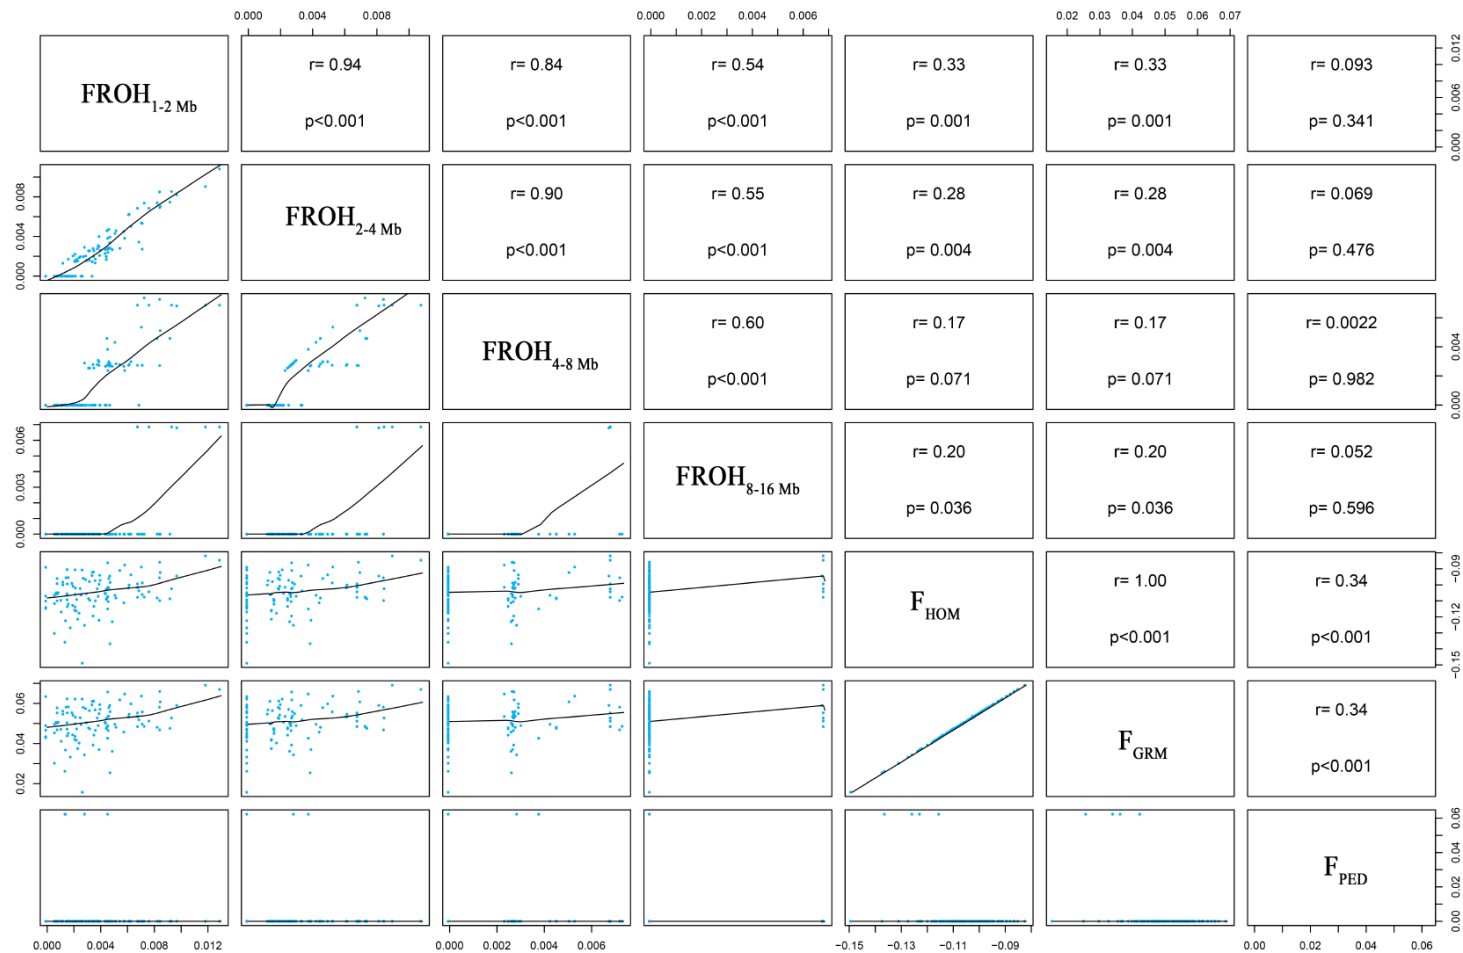

**Figure S1.** Runs of homozygosity patterns for all chromosome (Okis1 to Okis30) in three coho salmon population.

Each row represents one individual and each bar a ROH segment.
